# Supplementary material
Source: PubMed Central journal article supplement (PMC7863908)
Supplement: supp_AC120.015204_162234_3_supp_605977_qhl0jj.pdf [file supp_AC120.015204_162234_3_supp_605977_qhl0jj.pdf]

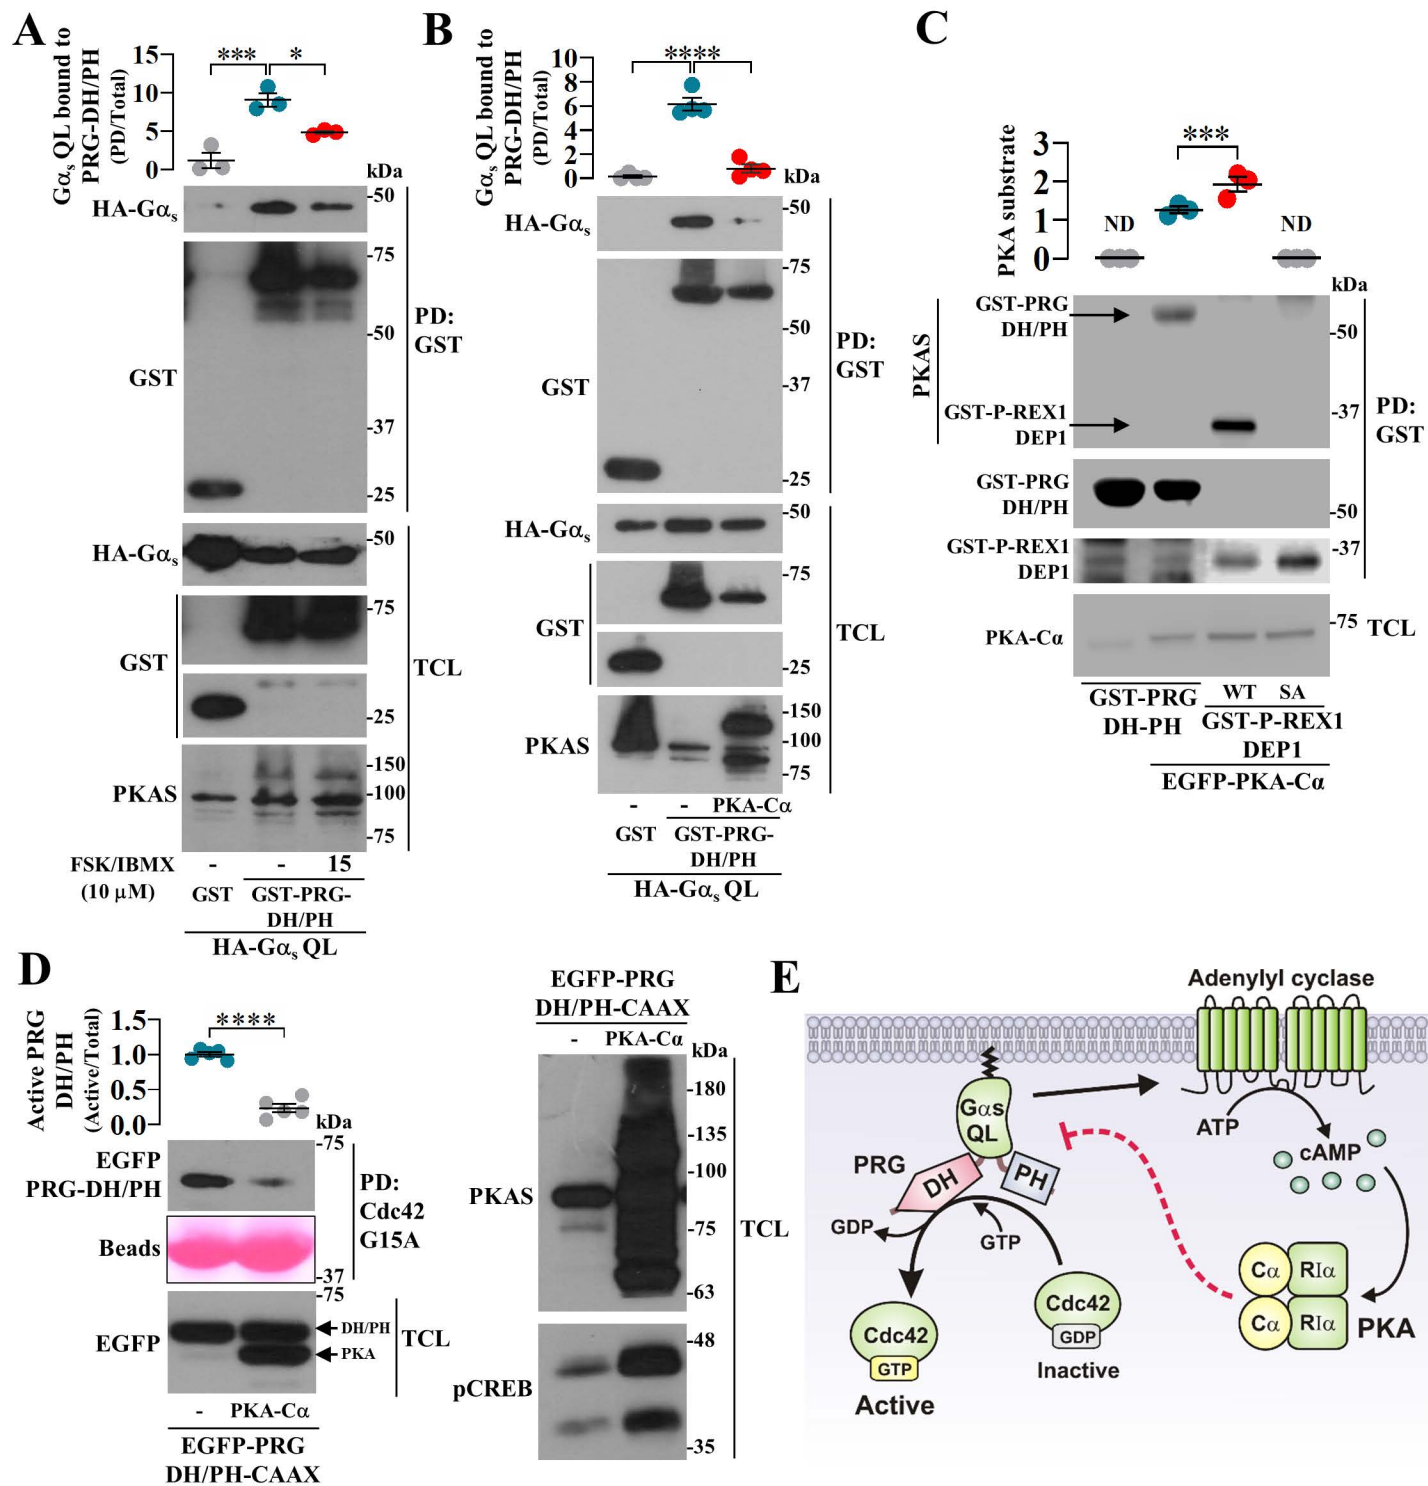

**Supplementary Figure 1. cAMP/PKA signaling attenuates  $G\alpha_s$ :PRG interaction and reduces PRG-DH/PH:Cdc42-G15A binding.** A-B) Effect of cAMP/PKA signaling on  $G\alpha_s$ :PRG interaction was studied by pull-down of GST-PRG-DH/PH and HA- $G\alpha_s$ -QL using lysates of HEK293T cells that were stimulated or not with forskolin/IBMX to activate adenylyl cyclase (A) or transfected with PKA catalytic subunits (B). Graphs represent the mean  $\pm$  S.E. (n=3); \*p=0.0196, \*\*\*p=0.009, \*\*\*\*p<0.0001, one-way ANOVA followed Tukey. C) Potential phosphorylation of PRG-DH/PH by PKA was analyzed in HEK293T cells transfected with GST-PRG-DH/PH without or with EGFP-PKA-C $\alpha$ . Cell lysates were subjected to GST-pull-down followed by western blot with PKAS antibodies to detect PKA substrates. GST-P-Rex1-DEP1 WT and SA (non-phosphorylatable mutant) were used as controls. Graphs represents the mean  $\pm$  S.E.; n=3, \*\*\*p=0.0006, t-test. D) Effect of catalytic PKA subunit on PRG-DH/PH:Cdc42-G15A binding was evaluated using lysates of HEK293T cells transfected with EGFP-PRG-DH/PH-CAAX and EGFP-PKA-C. Graphs represents the mean  $\pm$  S.E.; n=5, \*\*\*\*p<0.0001, t-test. E) Model postulates that the  $G\alpha_s$ :PRG:Cdc42 signaling pathway is fine-tuned by the PKA.
